# Supplementary material
Source: PubMed Central journal article supplement (PMC7321838)
Supplement: NIHMS1044455-supplement-Supplemental_Tables.pdf [file NIHMS1044455-supplement-Supplemental_Tables.pdf]

**Table S1: Comparison of Characteristics in the Sub-cohort versus All of FAVORIT**

|                                               | <b>Sub-cohort</b> | <b>Whole cohort</b> |
|-----------------------------------------------|-------------------|---------------------|
| <b>N</b>                                      | <b>491</b>        | <b>4110</b>         |
| Age $\pm$ SD                                  | 51 $\pm$ 9        | 52 $\pm$ 9          |
| Female, n (%)                                 | 188 (39%)         | 1528 (37%)          |
| Race                                          |                   |                     |
| White                                         | 368 (76%)         | 3084 (75%)          |
| Black                                         | 86 (18%)          | 728 (18%)           |
| Other                                         | 32 (7%)           | 270 (7%)            |
| Treatment group                               |                   |                     |
| High dose vitamin                             | 240 (49%)         | 2056 (50%)          |
| Low dose vitamin                              | 246 (51%)         | 2054 (50%)          |
| Country, n (%)                                |                   |                     |
| US                                            | 337 (69%)         | 3000 (73%)          |
| Canada                                        | 57 (12%)          | 498 (12%)           |
| Brazil                                        | 92 (19%)          | 612 (15%)           |
| Graft vintage, median [IQR]                   | 3.86 [1.70, 7.05] | 4.03 [1.67, 7.46]   |
| Living donor kidney, n (%)                    | 207 (43%)         | 1705 (42%)          |
| CVD, n (%)                                    | 93 (19%)          | 820 (20%)           |
| Diabetes, n (%)                               | 178 (37%)         | 1663 (41%)          |
| Smoking, n (%)                                |                   |                     |
| Never                                         | 242 (50%)         | 2001 (49%)          |
| Current                                       | 57 (12%)          | 451 (11%)           |
| Ever                                          | 187 (39%)         | 1611 (39%)          |
| Body mass index (kg/m <sup>2</sup> ) $\pm$ SD | 29.0 $\pm$ 5.9    | 29.2 $\pm$ 6.2      |
| SBP (mmHg) $\pm$ SD                           | 136 $\pm$ 20.0    | 136 $\pm$ 20        |
| DBP (mmHg) $\pm$ SD                           | 79 $\pm$ 13       | 78 $\pm$ 12         |
| eGFR (ml/min/1.73m <sup>2</sup> ) $\pm$ SD    | 46 $\pm$ 18       | 49 $\pm$ 18         |
| Urine ACR (mg/g), median [IQR]                | 24.5 [9.5, 105.6] | 24.5 [8.72, 102.1]  |

**Table S2. Baseline Characteristics by Quartile of Urine MCP-1 in Kidney Transplant Recipients in FAVORIT\***

|                                           | <b>Overall</b>    | <b>Q1</b>         | <b>Q2</b>         | <b>Q3</b>         | <b>Q4</b>         |
|-------------------------------------------|-------------------|-------------------|-------------------|-------------------|-------------------|
| Range (pg/mL)                             |                   | < 84.2            | 84.2 - 183.3      | 183.4 - 351.4     | ≥351.4            |
| N                                         | 473               | 119               | 118               | 119               | 117               |
| Age ± SD                                  | 51 ± 9            | 52 ± 9            | 50 ± 9            | 52 ± 9            | 52 ± 9            |
| Female, n (%)                             | 182 (39%)         | 54 (45%)          | 42 (36%)          | 43 (36%)          | 43 (37%)          |
| Race                                      |                   |                   |                   |                   |                   |
| White                                     | 358 (76%)         | 106 (88%)         | 81 (69%)          | 85 (71%)          | 86 (74%)          |
| Black                                     | 83 (18%)          | 9 (8%)            | 30 (25%)          | 25 (21%)          | 19 (16%)          |
| Other                                     | 32 (7%)           | 4 (3%)            | 7 (6%)            | 9 (8%)            | 12 (10%)          |
| Treatment group                           |                   |                   |                   |                   |                   |
| High dose vitamin                         | 232 (49%)         | 56 (47%)          | 56 (48%)          | 56 (47%)          | 64 (55%)          |
| Low dose vitamin                          | 241 (51%)         | 63 (53%)          | 62 (53%)          | 63 (53%)          | 53 (45%)          |
| Country, n (%)                            |                   |                   |                   |                   |                   |
| US                                        | 327 (69%)         | 97 (82%)          | 77 (65%)          | 74 (62%)          | 79 (68%)          |
| Canada                                    | 54 (11%)          | 13 (11%)          | 17 (14%)          | 13 (11%)          | 11 (9%)           |
| Brazil                                    | 92 (20%)          | 9 (8%)            | 24 (20%)          | 32 (27%)          | 27 (23%)          |
| Graft vintage, median [IQR]               | 3.86 [1.70, 7.05] | 3.57 [2.00, 7.41] | 4.10 [1.94, 8.21] | 3.63 [1.61, 6.11] | 3.77 [1.39, 6.69] |
| Living donor kidney, n (%)                | 202 (43%)         | 54 (45%)          | 54 (46%)          | 52 (44%)          | 42 (36%)          |
| Calcineurin inhibitor use, n (%)          | 415 (88%)         | 105 (88%)         | 104 (88%)         | 105 (88%)         | 101 (86%)         |
| Sirolimus use, n (%)                      | 48 (10%)          | 12 (10%)          | 7 (6%)            | 12 (10%)          | 17 (15%)          |
| CVD, n (%)                                | 91 (19%)          | 22 (19%)          | 24 (20%)          | 21 (18%)          | 24 (21%)          |
| Diabetes, n (%)                           | 173 (37%)         | 47 (40%)          | 41 (35%)          | 41 (35%)          | 44 (38%)          |
| Smoking, n (%)                            |                   |                   |                   |                   |                   |
| Never                                     | 237 (50%)         | 55 (46%)          | 65 (55%)          | 57 (48%)          | 60 (51%)          |
| Current                                   | 56 (12%)          | 15 (13%)          | 8 (7%)            | 16 (13%)          | 17 (15%)          |
| Ever                                      | 180 (38%)         | 49 (41%)          | 45 (38%)          | 46 (39%)          | 40 (34%)          |
| Body mass index (kg/m <sup>2</sup> ) ± SD | 29.0 ± 6.0        | 29.0 ± 6.0        | 30.2 ± 6.6        | 28.9 ± 5.7        | 28.0 ± 5.4        |
| SBP (mmHg) ± SD                           | 136 ± 20.0        | 134 ± 19          | 135 ± 19          | 137 ± 21          | 139 ± 21          |
| DBP (mmHg) ± SD                           | 79 ± 13           | 76 ± 12           | 81 ± 13           | 79 ± 13           | 81 ± 13           |
| eGFR (ml/min/1.73m <sup>2</sup> ) ± SD    | 46 ± 18           | 46 ± 16           | 48 ± 20           | 46 ± 17           | 45 ± 20           |

*Ix et al, AJKD, "Urine Fibrosis Markers and Risk of Allograft Failure in Kidney Transplant Recipients: The Folic Acid for Vascular Outcome Reduction in Transplantation (FAVORIT) Trial"*

---

|                                |                   |                  |                  |                   |                    |
|--------------------------------|-------------------|------------------|------------------|-------------------|--------------------|
| Urine ACR (mg/g), median [IQR] | 24.5 [9.5, 105.6] | 14.6 [6.4, 45.3] | 18.8 [7.9, 78.5] | 28.3 [9.9, 138.4] | 43.2 [14.9, 369.3] |
|--------------------------------|-------------------|------------------|------------------|-------------------|--------------------|

\* Data show characteristics by quartiles of urine MCP-1 within the Sub-Cohort Participants in FAVORIT.

**Table S3. Baseline Characteristics by Quartile of Urine PIIINP in Kidney Transplant Recipients in FAVORIT\***

|                                           | Overall           | Q1                | Q2                | Q3                | Q4                |
|-------------------------------------------|-------------------|-------------------|-------------------|-------------------|-------------------|
| Range (ug/L)                              |                   | < 2.09            | 2.09 - 3.63       | 3.64 - 6.15       | ≥ 6.16            |
| <b>N</b>                                  | <b>488</b>        | <b>122</b>        | <b>122</b>        | <b>122</b>        | <b>122</b>        |
| Age ± SD                                  | 51 ± 9            | 53 ± 9            | 51 ± 9            | 51 ± 9            | 51 ± 9            |
| Female, n (%)                             | 188 (39%)         | 57 (47%)          | 47 (39%)          | 43 (35%)          | 41 (34%)          |
| Race                                      |                   |                   |                   |                   |                   |
| White                                     | 370 (76%)         | 106 (87%)         | 89 (73%)          | 87 (71%)          | 88 (72%)          |
| Black                                     | 86 (18%)          | 12 (10%)          | 22 (18%)          | 23 (19%)          | 29 (24%)          |
| Other                                     | 32 (7%)           | 4 (3%)            | 11 (9%)           | 12 (10%)          | 5 (4%)            |
| Treatment group                           |                   |                   |                   |                   |                   |
| High dose vitamin                         | 242 (50%)         | 62 (51%)          | 56 (46%)          | 62 (51%)          | 62 (51%)          |
| Low dose vitamin                          | 246 (50%)         | 60 (49%)          | 66 (54%)          | 60 (49%)          | 60 (49%)          |
| Country, n (%)                            |                   |                   |                   |                   |                   |
| US                                        | 338 (69%)         | 89 (73%)          | 82 (67%)          | 84 (69%)          | 83 (68%)          |
| Canada                                    | 58 (12%)          | 22 (18%)          | 17 (14%)          | 12 (10%)          | 7 (6%)            |
| Brazil                                    | 92 (19%)          | 11 (9%)           | 23 (19%)          | 26 (21%)          | 32 (26%)          |
| Graft vintage, median [IQR]               | 3.83 [1.68, 7.03] | 4.74 [2.08, 7.99] | 4.15 [2.08, 8.06] | 3.64 [1.59, 6.41] | 2.74 [1.07, 6.19] |
| Living donor kidney, n (%)                | 207 (42%)         | 49 (40%)          | 55 (45%)          | 59 (48%)          | 44 (36%)          |
| Calcineurin inhibitor use, n (%)          | 429 (88%)         | 111 (91%)         | 110 (90%)         | 104 (85%)         | 104 (85%)         |
| Sirolimus use, n (%)                      | 49 (10%)          | 7 (6%)            | 6 (5%)            | 16 (13%)          | 20 (16%)          |
| CVD, n (%)                                | 94 (19%)          | 20 (16%)          | 28 (23%)          | 24 (20%)          | 22 (18%)          |
| Diabetes, n (%)                           | 179 (37%)         | 41 (34%)          | 42 (34%)          | 45 (37%)          | 51 (42%)          |
| Smoking, n (%)                            |                   |                   |                   |                   |                   |
| Never                                     | 243 (50%)         | 52 (43%)          | 62 (51%)          | 66 (54%)          | 63 (52%)          |
| Current                                   | 58 (12%)          | 13 (11%)          | 13 (11%)          | 15 (12%)          | 17 (14%)          |
| Ever                                      | 187 (38%)         | 57 (47%)          | 47 (39%)          | 41 (34%)          | 42 (34%)          |
| Body mass index (kg/m <sup>2</sup> ) ± SD | 29.0 ± 6.0        | 28.7 ± 5.4        | 28.4 ± 5.4        | 29.3 ± 6.5        | 29.6 ± 6.4        |
| SBP (mmHg) ± SD                           | 136 ± 20          | 132 ± 18          | 134 ± 19          | 138 ± 19          | 140 ± 22          |
| DBP (mmHg) ± SD                           | 79 ± 13           | 76 ± 11           | 79 ± 12           | 81 ± 12           | 81 ± 14           |

*Ix et al, AJKD, "Urine Fibrosis Markers and Risk of Allograft Failure in Kidney Transplant Recipients: The Folic Acid for Vascular Outcome Reduction in Transplantation (FAVORIT) Trial"*

|                                        |                   |                  |                  |                    |                    |
|----------------------------------------|-------------------|------------------|------------------|--------------------|--------------------|
| eGFR (ml/min/1.73m <sup>2</sup> ) ± SD | 46 ± 18           | 45 ± 17          | 49 ± 20          | 47 ± 19            | 43 ± 15            |
| Urine ACR (mg/g), median [IQR]         | 24.5 [9.5, 104.7] | 16.3 [6.9, 41.1] | 18.5 [7.9, 69.3] | 32.1 [10.7, 141.3] | 40.4 [11.9, 181.5] |

\* Data show characteristics by quartiles of urine PIIINP within the Sub-Cohort Participants in FAVORIT.

**Table S4. Baseline Characteristics by Quartile of Urine PINP in Kidney Transplant Recipients in FAVORIT\***

|                                           | <b>Overall</b>    | <b>Q1</b>         | <b>Q2</b>         | <b>Q3</b>         | <b>Q4</b>         |
|-------------------------------------------|-------------------|-------------------|-------------------|-------------------|-------------------|
| Range (ug/L)                              |                   | < 1.25            | 1.25 - 2.36       | 2.37 - 3.83       | ≥ 3.84            |
| N                                         | 488               | 123               | 121               | 122               | 122               |
| Age ± SD                                  | 51 ± 9            | 53 ± 9            | 51 ± 9            | 51 ± 9            | 50 ± 9            |
| Female, n (%)                             | 189 (39%)         | 51 (42%)          | 52 (43%)          | 40 (33%)          | 46 (38%)          |
| Race                                      |                   |                   |                   |                   |                   |
| White                                     | 370 (76%)         | 98 (80%)          | 101 (84%)         | 82 (67%)          | 89 (73%)          |
| Black                                     | 86 (18%)          | 16 (13%)          | 17 (14%)          | 31 (25%)          | 22 (18%)          |
| Other                                     | 32 (7%)           | 9 (7%)            | 3 (3%)            | 9 (7%)            | 11 (9%)           |
| Treatment group                           |                   |                   |                   |                   |                   |
| High dose vitamin                         | 242 (50%)         | 57 (46%)          | 62 (51%)          | 59 (48%)          | 64 (52%)          |
| Low dose vitamin                          | 246 (50%)         | 66 (54%)          | 59 (49%)          | 63 (52%)          | 58 (48%)          |
| Country, n (%)                            |                   |                   |                   |                   |                   |
| US                                        | 338 (69%)         | 102 (83%)         | 80 (86%)          | 70 (57%)          | 86 (71%)          |
| Canada                                    | 58 (12%)          | 10 (8%)           | 23 (19%)          | 14 (12%)          | 11 (9%)           |
| Brazil                                    | 92 (19%)          | 11 (9%)           | 18 (15%)          | 38 (31%)          | 25 (21%)          |
| Graft vintage, median [IQR]               | 3.86 [1.70, 7.05] | 3.52 [1.61, 7.11] | 4.28 [2.07, 7.33] | 3.98 [2.05, 8.01] | 2.92 [1.01, 6.35] |
| Living donor kidney, n (%)                | 207 (42%)         | 60 (49%)          | 50 (41%)          | 51 (42%)          | 46 (38%)          |
| Calcineurin inhibitor use, n (%)          | 429 (88%)         | 107 (87%)         | 113 (93%)         | 108 (89%)         | 101 (83%)         |
| Sirolimus use, n (%)                      | 49 (10%)          | 12 (10%)          | 6 (5%)            | 10 (8%)           | 21 (17%)          |
| CVD, n (%)                                | 94 (19%)          | 33 (27%)          | 20 (17%)          | 20 (16%)          | 21 (17%)          |
| Diabetes, n (%)                           | 179 (37%)         | 51 (42%)          | 41 (34%)          | 39 (32%)          | 48 (39%)          |
| Smoking, n (%)                            |                   |                   |                   |                   |                   |
| Never                                     | 243 (50%)         | 61 (50%)          | 56 (46%)          | 62 (51%)          | 64 (53%)          |
| Current                                   | 58 (12%)          | 9 (7%)            | 17 (14%)          | 17 (14%)          | 15 (12%)          |
| Ever                                      | 187 (38%)         | 53 (43%)          | 48 (40%)          | 43 (35%)          | 43 (35%)          |
| Body mass index (kg/m <sup>2</sup> ) ± SD | 29.0 ± 6.0        | 28.7 ± 5.9        | 29.4 ± 5.3        | 29.1 ± 6.5        | 28.7 ± 6.1        |
| SBP (mmHg) ± SD                           | 136 ± 20.0        | 134 ± 19          | 134 ± 18          | 138 ± 20          | 137 ± 23          |
| DBP (mmHg) ± SD                           | 79 ± 13           | 78 ± 10           | 79 ± 12           | 81 ± 14           | 79 ± 14           |

*Ix et al, AJKD, "Urine Fibrosis Markers and Risk of Allograft Failure in Kidney Transplant Recipients: The Folic Acid for Vascular Outcome Reduction in Transplantation (FAVORIT) Trial"*

|                                        |                   |                  |                  |                    |                    |
|----------------------------------------|-------------------|------------------|------------------|--------------------|--------------------|
| eGFR (ml/min/1.73m <sup>2</sup> ) ± SD | 46 ± 18           | 46 ± 16          | 47 ± 19          | 49 ± 18            | 42 ± 18            |
| Urine ACR(mg/g), median [IQR]          | 24.5 [9.5, 105.6] | 17.5 [7.1, 63.5] | 18.1 [8.8, 54.4] | 23.1 [10.2, 153.4] | 46.4 [11.9, 244.7] |

\* Data show characteristics by quartiles of Urine PINP within the Sub-Cohort Participants in FAVORIT.

**Table S5. Association of Urine Fibrosis Markers Indexed to Creatinine with Risk of Kidney Allograft Failure in FAVORIT**

| Range                                              | # Events | Event Rate (per 100 PY) | Model 1 HR (95% CI)           | Model 2 HR (95% CI)           | Model 3 HR (95% CI)           | Model 4 HR (95% CI)           |
|----------------------------------------------------|----------|-------------------------|-------------------------------|-------------------------------|-------------------------------|-------------------------------|
| <b>Urine <math>\alpha</math>1 Microglobulin/Cr</b> |          |                         |                               |                               |                               |                               |
| Per Log <sub>2</sub> Increase                      |          |                         | 2.24 (1.90, 2.64);<br>p<0.001 | 1.89 (1.58, 2.66);<br>p<0.001 | 1.98 (1.52, 2.58);<br>p<0.001 | 1.92 (1.46, 2.54);<br>p<0.001 |
| Q1 < 0.01                                          | 29       | 0.77                    | Reference                     | Reference                     | Reference                     | Reference                     |
| Q2 0.01 - 0.02                                     | 39       | 2.36                    | 2.64 (1.25, 5.56)             | 2.12 (0.99, 4.54)             | 2.44 (1.10, 5.41)             | 2.19 (0.98, 4.87)             |
| Q3 0.03 - 0.04                                     | 72       | 2.58                    | 7.00 (3.45, 14.19)            | 3.90 (1.85, 8.19)             | 4.50 (1.98, 10.20)            | 4.64 (2.00, 10.77)            |
| Q4 $\geq$ 0.05                                     | 115      | 5.49                    | 14.86 (7.15, 30.88)           | 7.59 (3.64, 15.81)            | 9.37 (3.56, 24.70)            | 8.57 (3.16, 23.22)            |
| <b>Urine MCP-1/Cr</b>                              |          |                         |                               |                               |                               |                               |
| Per Log <sub>2</sub> Increase                      |          |                         | 2.10 (1.71, 2.57);<br>p<0.001 | 1.74 (1.42, 2.14);<br>p<0.001 | 1.86 (1.48, 2.33);<br>p<0.001 | 1.60 (1.26, 2.03);<br>p<0.001 |
| Q1 < 1.07                                          | 41       | 1.83                    | Reference                     | Reference                     | Reference                     | Reference                     |
| Q2 1.07 - 1.79                                     | 48       | 1.25                    | 1.84 (0.99, 3.42)             | 1.97 (1.03, 3.77)             | 1.69 (0.85, 3.37)             | 1.57 (0.79, 3.14)             |
| Q3 1.80 - 2.95                                     | 60       | 2.22                    | 2.03 (1.10, 3.85)             | 1.35 (0.67, 2.69)             | 1.24 (0.58, 2.65)             | 1.33 (0.64, 2.78)             |
| Q4 $\geq$ 2.96                                     | 104      | 5.90                    | 5.35 (2.89, 9.89)             | 3.70 (1.94, 7.06)             | 3.17 (1.54, 6.51)             | 2.37 (1.14, 4.94)             |
| <b>Urine PIIINP/Cr</b>                             |          |                         |                               |                               |                               |                               |
| Per Log <sub>2</sub> Increase                      |          |                         | 1.38 (1.17, 1.63);<br>p<0.001 | 1.20 (1.02, 1.40);<br>p=0.028 | 1.02 (0.86, 1.21);<br>p=0.840 | 0.80 (0.68, 0.95);<br>p=0.012 |
| Q1 < 0.03                                          | 46       | 1.34                    | Reference                     | Reference                     | Reference                     | Reference                     |
| Q2 0.03 - 0.04                                     | 57       | 1.78                    | 1.75 (0.98, 3.14)             | 1.29 (0.71, 2.35)             | 1.36 (0.73, 2.52)             | 0.94 (0.49, 1.80)             |
| Q3 0.05 - 0.06                                     | 66       | 3.54                    | 2.84 (1.53, 5.26)             | 2.08 (1.13, 3.81)             | 1.48 (0.76, 2.87)             | 0.61 (0.28, 1.30)             |
| Q4 $\geq$ 0.07                                     | 88       | 4.58                    | 3.68 (2.03, 6.66)             | 1.88 (1.00, 3.52)             | 1.14 (0.55, 2.33)             | 0.35 (0.15, 0.82)             |
| <b>Urine PINP/Cr</b>                               |          |                         |                               |                               |                               |                               |
| Per Log <sub>2</sub> Increase                      |          |                         | 1.33 (1.18, 1.51);<br>p<0.001 | 1.19 (1.05, 1.35);<br>p=0.006 | 1.10 (0.96, 1.27);<br>p=0.155 | 1.01 (0.88, 1.16);<br>p=0.918 |
| Q1 < 0.02                                          | 50       | 1.88                    | Reference                     | Reference                     | Reference                     | Reference                     |
| Q2 0.02 - 0.03                                     | 52       | 1.67                    | 1.70 (0.95, 3.03)             | 1.75 (0.96, 3.18)             | 1.80 (0.99, 3.28)             | 1.65 (0.89, 3.07)             |
| Q3 0.03 - 0.04                                     | 55       | 1.69                    | 1.51 (0.84, 2.69)             | 0.91 (0.48, 1.72)             | 0.71 (0.36, 1.40)             | 0.60 (0.30, 1.20)             |
| Q4 $\geq$ 0.05                                     | 100      | 6.11                    | 4.19 (2.36, 7.44)             | 2.89 (1.59, 5.24)             | 2.07 (1.09, 3.92)             | 1.10 (0.55, 2.23)             |

Model 1: Adjusted for age, sex, race, country, randomized treatment, diabetes, SBP, CVD, smoking, graft vintage, living donor.

Model 2: Model 1 plus eGFR and urine albumin.

Model 3: Model 2 plus NGAL, IL-18, KIM-1, and L-FABP

Model 4: Model 3 plus urine PIIINP, PINP,  $\alpha$ 1microglobulin, and MCP-1

# Events refers to kidney allograft failure events.
